# Supplementary material
Source: PubMed Central journal article supplement (PMC7036579)
Supplement: tmh-0047-0061-s01.pdf [file tmh-0047-0061-s01.pdf]

1 **Additional file 1**

2 **Figure 1.** ROC curves of the random combined prediction of iron, transferrin (saturation), hepcidin  
3 and ferritin for AI.

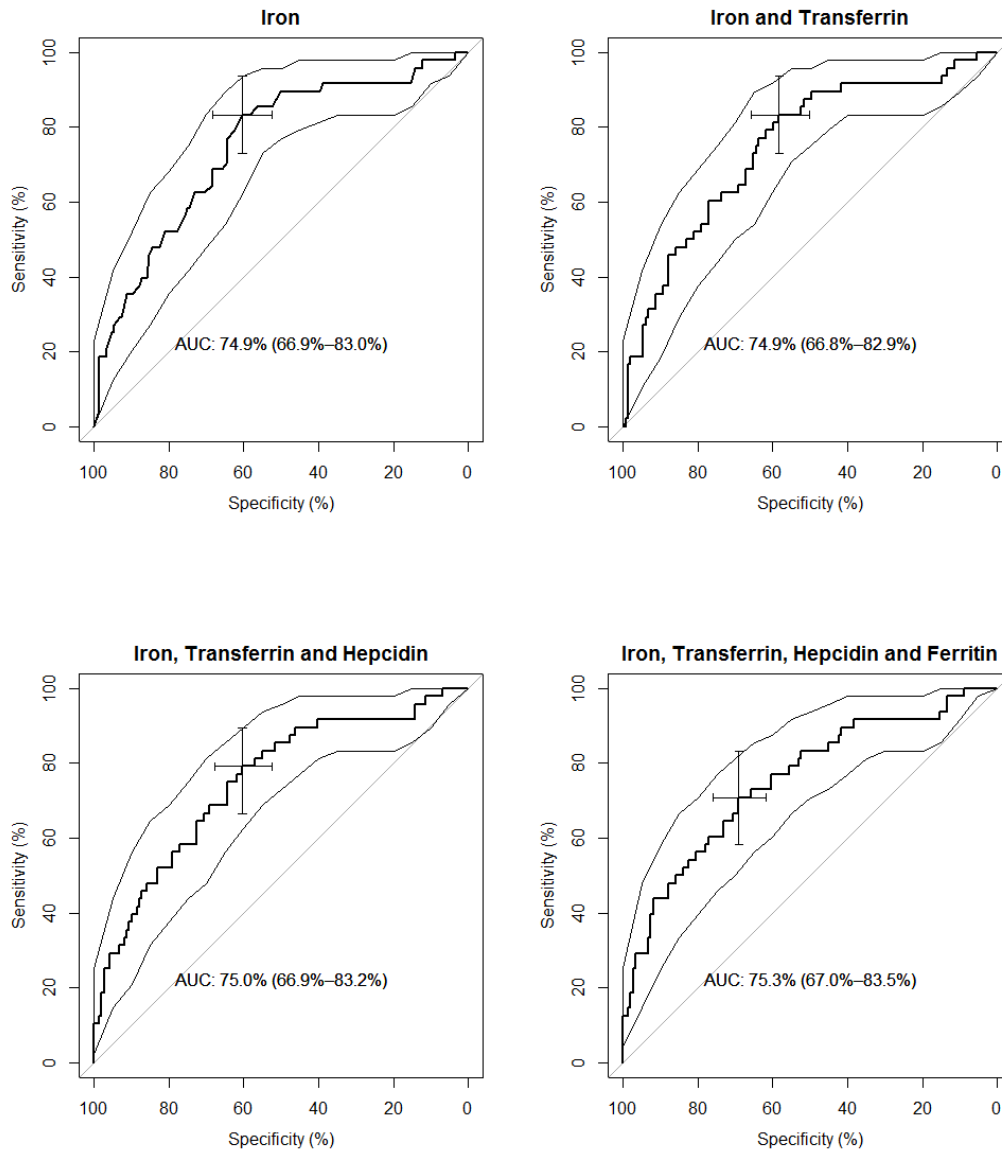

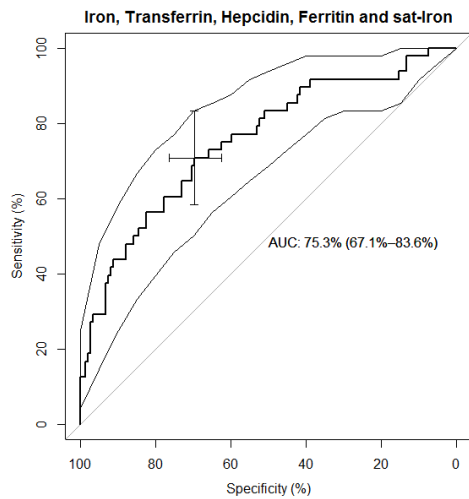

- 1
- 2
- 3
- 4
- 5
- 6
- 7
- 8
- 9
- 10
- 11

*Combined prediction of iron parameters*

AUC (95% Confidence Interval)

Iron: 0.749 (0.669-0.83)

Iron + Transferrin: 0.749 (0.668-0.829)

Iron + Transferrin + Hepcidin: 0.75 (0.669-0.832)

Iron + Transferrin + Hepcidin + Ferritin: 0.753 (0.67-0.835)

Iron + Transferrin + Hepcidin + Ferritin +Transferrin saturation: 0.75 (0.67-0.84)

---

Optimal cut-off values sensitivity and specificity for the combined predictive values of Iron,  
Transferrin, Hepcidin and Ferritin

|             | I    | I+T  | I+T+H | I+T+H+F | I+T+TF+H+F |
|-------------|------|------|-------|---------|------------|
| Sensitivity | 0.77 | 0.77 | 0.77  | 0.77    | 0.71       |
| Specificity | 0.64 | 0.64 | 0.64  | 0.64    | 0.68       |

---

- 12
- 13
